# Practice of Hyperglycaemia Control in Intensive Care Units of the Military Hospital, Sudan - Needs of a Protocol

1. **Ghada Omer Hamad Abd El-Raheem**, Intensive Care Unit, Military Hospital, Khartoum, Sudan.

& University of Medical Sciences and Technology UMST, High Diploma in Research Methodology and Biostatistics, Khartoum, Sudan. P.O. Box 12810, Mecca street, Khartoum, Sudan, E-mail: [ghadaomer90@gmail.com](mailto:ghadaomer90@gmail.com). Phone numbers: +249922572830 / + 249902623636

2. **Mudawi Mohammed Ahmed Abdallah** Intensive Care Unit, Military Hospital, Medical Manager of Critical Care Department. Military Hospital, Omdurman, Khartoum, Sudan. E-mail: [mudawi81@gmail.com](mailto:mudawi81@gmail.com). Phone: +249 123229555

3. **Mounkaila Noma**. University of Medical Sciences and Technology, P.O. Box 12810, Mecca street, Khartoum, Sudan. E-mail: [mounkailanoma@gmail.com](mailto:mounkailanoma@gmail.com) / [noma.mounkaila@umst-edu.sd](mailto:noma.mounkaila@umst-edu.sd). Phone: +249 91 647 5305

\*Corresponding author: [ghadaomer90@gmail.com](mailto:ghadaomer90@gmail.com).

## 28 **Abstract**

29 Hyperglycaemia is a major risk factor in critically ill patients as it leads to adverse outcomes and  
30 mortality in diabetic and non-diabetic patients. The target blood glucose remained controversial; this  
31 study aimed to contribute in assessing the practice of hyperglycaemia control in intensive care units  
32 of Khartoum Military Hospital. Furthermore, it proposed a protocol for hyperglycaemia control  
33 based on findings. A hospital-based cross-sectional study assessed the awareness and practice  
34 towards hyperglycaemia management in a sample of 83 healthcare staff selected through stratified  
35 random sampling technique. In addition, 55 patients were enrolled, through quota sampling, after  
36 excluding those with diabetic ketoacidosis, hyperosmolar-hyperglycaemic state and patients < 18  
37 years. A self-administrated questionnaire enabled to collect data from healthcare staff, patients data  
38 were extracted from medical records. SPSS 23 was used to analyse the collected data. Chi-square  
39 and ANOVA tests assessed the association among variables. All statistical tests were considered  
40 statistically significant when  $p < 0.05$ . The training on hyperglycaemia control differed statistically  
41 ( $p= 0.017$ ) among healthcare staff. The target glycaemic level (140-180 mg/dl) was knew by 11.1%  
42 of the study participants. Neither the knowledge nor the practice of hyperglycaemia control methods  
43 differed among staff ( $p> 0.05$ ). The use of sliding scale was 79.3% across the ICUs with a  
44 statistically significant difference ( $p= 0.002$ ). 31.5% of patients had received glycaemic control  
45 based on different methods and 11.8% were in the targeted blood glucose level. Sliding scale was the  
46 prevalent method used by doctors (71.4%) and nurses (81.6%). A patient benefited from insulin  
47 infusion method, which achieved the NICE-SUGAR target. The poor knowledge and lack of  
48 awareness towards hyperglycaemia monitoring led to inappropriate implementation of glycaemia  
49 control methods across the Military Hospital ICUs. Sustained training programs on hyperglycaemia  
50 control to ICU staff and the availability of a protocol on glycaemia control are highly required.

51 **Keywords:** Local protocol, Hyperglycaemia control, Intensive Care Unit, critically ill, Sudan.

52

53

## 54 **Introduction**

55 Hyperglycaemia is a major risk factor affecting critically ill patients leading to adverse outcomes and  
56 a high mortality in diabetic and non-diabetic patients [1-4]. Stressful situations, as acute illness and  
57 surgery in particular neurosurgery, elevate the levels of stress hormones and increase hepatic glucose  
58 production, lipolysis and insulin resistance [5-7]. The stress cascade increases by 7-8 folds in patients  
59 undergoing surgery [8, 9] leading to more than three folds increase in post-surgical complications  
60 and by six folds for mortality [7]. The target blood glucose (BG) had been controversial. Leuven 1  
61 study was the first landmark clinical trial that revealed the benefits of reduced morbidity and  
62 mortality related to intensive insulin therapy (IIT) in surgical critically ill patients [3, 10]. However,  
63 the second Leuven trial with a higher hypoglycaemia rate, pointed out that in medical intensive care  
64 unit (ICU) patients, there was a no statistically significant difference in mortality rate between tight  
65 blood glucose group (80-110 mg/dl) and control group [2, 3, 10]. In 2009, the practice changed  
66 following the publication of the Normoglycaemia in Intensive Care Evaluation (NICE) and Survival  
67 Using Glucose Algorithm Regulation (SUGAR) trial [11]. It revealed that the mortality and the  
68 hypoglycaemia increased in the intensive insulin therapy group compared to the conventional group.  
69 Furthermore, a subgroup analysis indicated a no difference in outcomes between medical, surgical,  
70 diabetic, non-diabetic and septic patients [2, 3, 7]. With respect to these results, conventional target  
71 of < 180 mg/dl was acceptable for most ICU patients [4] and adopted by various professional  
72 organizations [2, 3, 12, 13], except the American College of Physicians (ACP) which proposed a  
73 higher target of BG (< 200 mg/dl) [14]. These controversial benefits from intensive insulin therapy  
74 should not shadow the reduction of complications and length of hospitalization in hepatobiliary-  
75 pancreatic surgical patients [15]. Intravenous insulin through infusion pump is the method applied  
76 for ICU patients [11, 13]. The concomitant use of sub-cutaneous insulin glargine remains more  
77 efficacious than insulin infusion alone, in particular in patients with coronary artery bypass graft [16,  
78 17].

79 For policy development, it is crucial to assess the current practice by surveying both healthcare staff  
80 and patients to identify barriers and facilitators through a gap analysis to establish the best practice

81 [18]. Regarding hyperglycaemia control policy, the major safety issue remained hypoglycaemia,  
82 especially in ICU patients, as the usual symptoms might not be noticed [19]. Hypoglycaemia defines  
83 as blood glucose level < 70 mg/dl and severe life threatening when it is < 40 mg/dl [11, 20, 21].

84 Protocols were developed as written instructions to prevent the fluctuation in BG due to changes of  
85 interventions as administering steroids, vasopressors or parenteral quinine or due to changes in  
86 nutrition support [22]. As hyperglycaemia is more prevalent in patients receiving parenteral nutrition  
87 [9], BG levels did not differ among eating and non-per oral (NPO) patients [23]. The protocols had  
88 differences in their target BG, monitoring frequencies, infusion rates and use of boluses [24]. Hence,  
89 they must be customized to suit local resources, staff competency [25] and the needs of patients [25-  
90 27]. Examples of these protocols are Portland I, Washington University, and Yale University  
91 protocols. Yale Protocol had more difficult calculations than the other protocols [28], however, its  
92 hypoglycaemia rate was lower than Leuven protocol [22]. The Nottingham University Hospitals  
93 (NUH) protocol adopted BG target levels, which were consistent with the NICE-SUGAR target [13].

94 Alternative approaches to written policies are computerized protocols such as glucommanders [28],  
95 star protocol [4] and space glucose control (SGC) system [29]. Although, they reduced the nursing  
96 workload and had lower hypoglycaemia rates [21], they had not changed the general practice [27].

97 This study assessed the practice of healthcare staff on hyperglycaemia control in intensive care units  
98 of Khartoum Military Hospital and proposed a protocol for hyperglycaemia control from lessons  
99 learnt.

## 100 **Materials and Methods**

101 A hospital- based cross-sectional study assessed the awareness, and practice of healthcare staff  
102 towards hyperglycaemia management and the burden of hyperglycaemia control based medical  
103 records of critically ill patients in the intensive care units of the Military Hospital of Khartoum State,  
104 Sudan. The Military Hospital is a complex of seven specialized hospitals totalizing 722 beds and 8  
105 ICUs. A multistage sampling technique was used. At first level, five ICUs were systematically  
106 included in the study after excluding the neonatal, the maternity and the medical ICUs the last being

107 under reconstruction. At second level, a stratified random sampling technique enabled to select 83  
108 health professionals (doctors and nurses) proportionally to the size of each ICU after excluding the  
109 administrative staff. Regarding the patients included in the study, a quota of 12 patients was fixed to  
110 randomly recruit participants from each of the five ICUs. This led to an estimated sample of 60  
111 patients. Fifty-five patients were enrolled in the study after excluding those with either diabetic  
112 ketoacidosis (DKA) or hyperosmolar hyperglycaemic state (HHS) and patients < 18 years. Data were  
113 collected through a standardized questionnaire comprising two parts. Part one was a self-  
114 administrated questionnaire filled by the healthcare staff working in ICUs to collect their  
115 sociodemographic characteristics, their number of years of working experience, their knowledge and  
116 practice on hyperglycaemia control methods and levels as well as the management of  
117 hyperglycaemia. Part two extracted data from the medical records of ICU patients hospitalized at the  
118 time of the data collection. The characteristics of the patients: age, gender, status (medical or  
119 surgical), type of hyperglycaemia (diabetes type 1, 2 or non-diabetic), associated comorbidities,  
120 methods of blood glucose measurement and levels were recorded. The statistical package for social  
121 sciences (SPSS version 23) was used to describe and analyse the data. Statistical analysis performed  
122 were chi-square tests and analysis of variance (ANOVA) to determine association among variables.  
123 All tests were considered statistically significant when  $p < 0.05$ .

## 124 **Results**

### 125 **Characteristics of the Healthcare Staff and their training on** 126 **hyperglycaemia control** 127

128 The majority (74.1%, 60/81) of the participants were nurses and the remaining 25.9% (21/81) were  
129 doctors. 77.8% (63/81) of the participants were aged 25-30 years with no statistical association  
130 ( $p=0.05$ ) between the age of the participants and their occupation as indicated by table 1. The years  
131 of working experience of the participants ranged between 0.1 year and 12 years with median of 1  
132 year; while, working years in intensive care unit ranged from 0.01 years to 8 years with a median of  
133 working years of 0.5 years. 66.7% (14/21) of the doctors received training on hyperglycaemia

134 control and 36.7% (22/60) of the nurses were trained with a statistically significant difference ( $\chi^2 =$   
 135 5.67,  $p=0.017$ ) between the status and being trained on hyperglycaemia.

136 **Table 1: Characteristics of the healthcare staff and training on glycaemic control (n=81)**

| Characteristics                          | Status of the staff |             |           |             | Total     | Likelihood ratio | p-value |
|------------------------------------------|---------------------|-------------|-----------|-------------|-----------|------------------|---------|
|                                          | Doctor              | %           | Nurse     | %           |           |                  |         |
| <b>Age:</b>                              |                     |             |           |             |           |                  |         |
| 25-30 years                              | 13                  | 20.6        | 50        | 79.4        | 63        | 77.8             |         |
| > 30 years                               | 8                   | 44.4        | 10        | 55.6        | 18        | 22.2             | 3.835   |
| <b>Total (%)</b>                         | <b>21</b>           | <b>25.9</b> | <b>60</b> | <b>74.1</b> | <b>81</b> | <b>100.0</b>     |         |
| <b>Gender:</b>                           |                     |             |           |             |           |                  |         |
| Female                                   | 19                  | 28.8        | 47        | 71.2        | 66        | 81.5             |         |
| Male                                     | 2                   | 13.3        | 13        | 86.7        | 15        | 18.5             | 1.697   |
| <b>Total (%)</b>                         | <b>21</b>           | <b>25.9</b> | <b>60</b> | <b>74.1</b> | <b>81</b> | <b>100.0</b>     | 0.193   |
| <b>ICU working experience:</b>           |                     |             |           |             |           |                  |         |
| <1year                                   | 11                  | 20.4        | 43        | 79.6        | 54        | 66.7             |         |
| 1-3 years                                | 9                   | 45.0        | 11        | 55.0        | 20        | 24.7             | 4.849   |
| >3 years                                 | 1                   | 14.3        | 6         | 85.7        | 7         | 8.6              | 0.089   |
| <b>Total (%)</b>                         | <b>21</b>           | <b>25.9</b> | <b>60</b> | <b>74.1</b> | <b>81</b> | <b>100.0</b>     |         |
| <b>Training about Glycaemic control:</b> |                     |             |           |             |           |                  |         |
| Trained                                  | 14                  | 38.9        | 22        | 61.1        | 36        | 44.4             |         |
| Untrained                                | 7                   | 15.6        | 38        | 84.4        | 45        | 55.6             | 5.67*   |
| <b>Total (%)</b>                         | <b>21</b>           |             | <b>60</b> |             | <b>81</b> | <b>100.0</b>     | 0.017   |

137 \*chi-square test

## 138 Awareness of healthcare staff towards the target blood glucose level

139

140 The 81 healthcare staff were asked if they knew the target blood glucose (BG) level, 88.9% (72/81)  
 141 replied yes, 27.8% (20/72) of them were doctors and 72.2% (52/72) were nurses. They were 11.1%  
 142 (9/81) who did not know, 11.1% (1/9) were doctors and 88.9% (8/9) were nurses. There was a no  
 143 statistically significant association (Likelihood ratio=1.349,  $p= 0.245$ ) between the awareness about  
 144 target BG level and the staff status. However, when prompted to provide the exact level of the target  
 145 blood glucose, they were 11.1% (8/72) who provided the correct level (140-180 mg/dl) and 88.9%  
 146 (64/72) reported incorrect levels. Of the eight participants who reported the correct level, 62.5%  
 147 (5/8) were doctors and 37.5% (3/8) were nurses. A statistically significant difference (Fisher's Exact  
 148 Test,  $p= 0.033$ ) was found between the reported level of blood glucose and the status of the  
 149 healthcare staff.

150 **Awareness of healthcare staff about Basal-Bolus and Insulin infusion**  
 151 **methods**

152 Regarding the hyperglycaemia control methods, Basal-Bolus and Insulin Infusion, there was no  
 153 statistical significant association between having training or not on hyperglycaemia control methods  
 154 and health profession with a *p-value* of respectively 0.591 and 0.371 (table 2).

155 Of the 27 staff members (6 doctors and 21 nurses) who did not know about *Basal-Bolus method*, the  
 156 main reason was the lack of knowledge reported by 96.3% (26/27) of the staff. There was no  
 157 statistically significant difference (Likelihood ratio=3.147, *p*=0.076) between the reasons of lack of  
 158 awareness and the profession of healthcare staff (table 2). Regarding *Insulin Infusion method*, of the  
 159 67 staff members (16 doctors and 51 nurses) who did not know about it, the main reason was also the  
 160 lack of knowledge reported by 97 % (65/67) of the staff. There was a no statistically significant  
 161 difference (Likelihood ratio=5.929, *p*=0.52) between the reasons for lack of awareness and the status  
 162 of staff pas revealed by table 2.

163 **Table 2: Awareness of health care staff towards hyperglycaemia control methods and the reasons for**  
 164 **lack of awareness (n=81)**

| Training                                       | Topic        | Status of the staff |             |           |             | Total     | %          | Likelihood ratio | <i>p</i> -value |
|------------------------------------------------|--------------|---------------------|-------------|-----------|-------------|-----------|------------|------------------|-----------------|
|                                                |              | Doctor              | %           | Nurse     | %           |           |            |                  |                 |
| <b>Awareness about Basal-Bolus method</b>      |              |                     |             |           |             |           |            |                  |                 |
| Trained                                        | Aware        | 11                  | 42.3        | 15        | 57.7        | 26        | 72.2       | 0.471            | 0.493           |
|                                                | Unaware      | 3                   | 30          | 7         | 70          | 10        | 27.8       |                  |                 |
|                                                | Total        | 14                  | 38.9        | 22        | 61.1        | 36        | 44.4       |                  |                 |
| Untrained                                      | Aware        | 4                   | 14.3        | 24        | 85.7        | 28        | 62.2       | 0.09             | 0.764           |
|                                                | Unaware      | 3                   | 17.6        | 14        | 82.4        | 17        | 37.8       |                  |                 |
|                                                | Total        | 7                   | 15.6        | 38        | 84.4        | 45        | 55.6       |                  |                 |
| Total n (%)                                    | Aware        | 15                  | 27.8        | 39        | 72.2        | 54        | 66.7       | 0.289*           | 0.591           |
|                                                | Unaware      | 6                   | 22.2        | 21        | 77.8        | 27        | 33.3       |                  |                 |
|                                                | <b>Total</b> | <b>21</b>           | <b>25.9</b> | <b>60</b> | <b>74.1</b> | <b>81</b> | <b>100</b> |                  |                 |
| <b>Awareness about Insulin Infusion method</b> |              |                     |             |           |             |           |            |                  |                 |
| Trained                                        | Aware        | 4                   | 50          | 4         | 50          | 8         | 22.2       | 0.525            | 0.469           |
|                                                | Unaware      | 10                  | 35.7        | 18        | 64.3        | 28        | 77.8       |                  |                 |
|                                                | Total        | 14                  | 38.9        | 22        | 61.1        | 36        | 44.4       |                  |                 |
| Untrained                                      | Aware        | 1                   | 16.7        | 5         | 83.3        | 6         | 13.3       | 0.006            | 0.936           |
|                                                | Unaware      | 6                   | 15.4        | 33        | 84.6        | 39        | 86.7       |                  |                 |
|                                                | Total        | 7                   | 15.6        | 38        | 84.4        | 45        | 55.6       |                  |                 |
| Total n (%)                                    | Aware        | 5                   | 35.7        | 9         | 64.3        | 14        | 17.3       | 0.801            | 0.371           |
|                                                | Unaware      | 16                  | 23.9        | 51        | 76.1        | 67        | 82.7       |                  |                 |
|                                                | <b>Total</b> | <b>21</b>           | <b>25.9</b> | <b>60</b> | <b>74.1</b> | <b>81</b> | <b>100</b> |                  |                 |

**Reasons for lack of awareness about Basal-Bolus method**

|                                                                      |           |             |           |             |           |            |       |       |
|----------------------------------------------------------------------|-----------|-------------|-----------|-------------|-----------|------------|-------|-------|
| Medical training (lack of knowledge)                                 | 5         | 19.2        | 21        | 80.8        | 26        | 96.3       | 3.147 | 0.076 |
| Information overload (unable to keep up with the guidelines updates) | 1         | 100         | 0         | 0           | 1         | 3.7        |       |       |
| <b>Total n (%)</b>                                                   | <b>6</b>  | <b>22.2</b> | <b>21</b> | <b>77.8</b> | <b>27</b> | <b>100</b> |       |       |
| <b>Reasons for lack of awareness about Insulin Infusion method</b>   |           |             |           |             |           |            |       |       |
| Risk of formal complaint (afraid of responsibility)                  | 1         | 100         | 0         | 0           | 1         | 1.5        | 5.929 | 0.52  |
| Not standards of practice (unusual routine)                          | 1         | 100         | 0         | 0           | 1         | 1.5        |       |       |
| Medical training (lack of knowledge)                                 | 14        | 21.5        | 51        | 78.5        | 65        | 97         |       |       |
| <b>Total n (%)</b>                                                   | <b>16</b> | <b>23.9</b> | <b>51</b> | <b>76.1</b> | <b>67</b> | <b>100</b> |       |       |

165 \*Chi-square test

## 166 Practice of healthcare staff towards glycaemic control

### 167 Practice towards blood glucose monitoring frequency

168 The practice of staff towards blood glucose (BG) measurement was assessed as either more  
169 frequently (< 6 hourly) or less frequently (≥ 6 hourly).

170 Regarding doctors, 47.6% (10/21) measured BG more frequently, among them, 80% (8/10) were  
171 trained on hyperglycaemia control and 20% (2/10) were not. The remaining 52.4% (11/21) measured  
172 BG level less frequently, 54.5% (6/11) were trained and 45.5% (5/11) were untrained. There was no  
173 statistically significant association (Likelihood ratio=1.567,  $p=0.211$ ) between the training status of  
174 doctors and their practice toward BG monitoring frequency.

175 With regard to nurses, 35.0% (21/60) measured BG more frequently, among them, 42.9% (9/21)  
176 received training on hyperglycaemia control and 57.1% (12/21) did not. The remaining 65.0%  
177 (39/60) measured BG level less frequently, 33.3% (13/39) were trained and 66.7% (26/39) were  
178 untrained. A non-statistically significant association ( $\chi^2=0.533$ ,  $p=0.465$ ) was found between the  
179 training status of nurses and their practice toward BG monitoring frequency.

180 In the overall, a no statistically significant association was found ( $\chi^2=2.197$ ,  $p=0.138$ ) between the  
181 training of staff and their practice towards BG monitoring frequency.

### 182 Management of diabetic ketoacidosis

183 In the overall, the appropriate management of diabetic ketoacidosis (DKA), consisting of  
184 overlapping the I.V and S.C insulin was performed by 29.6% (24/81) of the participants. The  
185 remaining 70.4% (57/81) either they stopped the I.V insulin then start the S.C insulin (56.8%, 46/81)



186 or they did not know what to do (13.6%, 11/81); with a statistically significant difference between  
 187 doctors and nurses as revealed by table 3.

188 **Table 3: Management of diabetic ketoacidosis (DKA) by the participants according to their status of**  
 189 **training on glycaemia control (n=81)**

| <b>DKA Management</b>                           | <b>Doctor</b> | <b>%</b>    | <b>Nurse</b> | <b>%</b>    | <b>Health Staff</b> | <b>%</b>   | <b>Likelihood ratio</b> | <b>P-value</b> |
|-------------------------------------------------|---------------|-------------|--------------|-------------|---------------------|------------|-------------------------|----------------|
| <i>Trained</i>                                  |               |             |              |             |                     |            |                         |                |
| Stop the I.V insulin then start the S.C insulin | 4             | 21.1        | 15           | 78.9        | 19                  | 52.8       | 6.627                   | 0.036          |
| Overlap the I.V and S.C                         | 9             | 56.3        | 7            | 43.8        | 16                  | 44.4       |                         |                |
| Do not know                                     | 1             | 100         | 0            | 0           | 1                   | 2.8        |                         |                |
| <b>Total</b>                                    | <b>14</b>     | <b>38.9</b> | <b>22</b>    | <b>61</b>   | <b>36</b>           | <b>100</b> |                         |                |
| <i>Untrained</i>                                |               |             |              |             |                     |            |                         |                |
| Stop the I.V insulin then start the S.C insulin | 4             | 14.8        | 23           | 85.2        | 27                  | 60         | 5.663                   | 0.059          |
| Overlap the I.V and S.C                         | 3             | 37.5        | 5            | 62.5        | 8                   | 17.8       |                         |                |
| Do not know                                     | 0             | 0           | 10           | 100         | 10                  | 22.2       |                         |                |
| <b>Total</b>                                    | <b>7</b>      | <b>15.6</b> | <b>38</b>    | <b>84</b>   | <b>45</b>           | <b>100</b> |                         |                |
| <i>Trained and untrained</i>                    |               |             |              |             |                     |            |                         |                |
| Stop the I.V insulin then start the S.C insulin | 8             | 17.4        | 38           | 82.6        | 46                  | 56.8       | 10.229                  | 0.006          |
| Overlap the I.V and S.C                         | 12            | 50          | 12           | 50          | 24                  | 29.6       |                         |                |
| Do not know                                     | 1             | 9.1         | 10           | 90.9        | 11                  | 13.6       |                         |                |
| <b>Total</b>                                    | <b>21</b>     | <b>25.9</b> | <b>60</b>    | <b>74.1</b> | <b>81</b>           | <b>100</b> |                         |                |

190

191 **Practice of healthcare staff towards glycaemia measurement and control methods**  
 192 **used in the different Intensive care units**

193 Across the three types of intensive care units, *HbA1c measurement* was requested by 69.5% (57/82)  
 194 of the health staff and the remaining 30.5% (25/82) did not. In cardiac care unit (CCU), the request  
 195 was from all (8/8) the staff; while in mixed and surgical ICUs it was respectively from 71.9% (46/64)  
 196 and 30% (3/10) of the staff. There was a statistically significant association (Likelihood  
 197 ratio=12.584,  $p=0.002$ ) between ICU type and the request of HbA1c measurement.

198 *Sliding scale method* was used by 79.3% (65/82) of all the ICU staff, 90% (9/10) of the surgical ICU  
 199 staff, 84.4% (54/64) of the mixed and 25% (2/8) of the cardiac ICUs. In the overall, across these  
 200 three types of ICU, sliding scale method was used by 79.3% (65/82) of the staff and they were 20.7%  
 201 (17/82) who used other methods. These other methods used by the remaining 17 staff members were  
 202 Basal-Bolus method (82.3%, 14/17), mixed insulin method (11.8%, 2/17) and insulin infusion (5.9%,

203 1/17). There was a statistically significant association (Likelihood ratio=12.728,  $p=0.002$ ) between  
204 the use of sliding scale method and the type of the ICU.

## 205 **Hyperglycaemia control methods used by health care professionals**

206 Figure 1 revealed the distribution of staff by hyperglycaemia method used. The sliding scale was the  
207 prevalent method used by both doctors and nurses with respectively 71.4% (15/21) and 81.6%  
208 (49/60). The other control methods (basal bolus, insulin Infusion and mixed insulin) were used by  
209 respectively 28.6% (6/21) and 18.3% (11/60) of the doctors and nurses. A no statistically significant  
210 difference (Likelihood ratio=0.938,  $p=0.333$ ) was found between hyperglycaemia control method  
211 used and the position of healthcare staff.

### 212 **Figure 1: Hyperglycaemia control methods used among health care professionals**

213 When asked to provide reasons for using either sliding scale or other hyperglycaemia control  
214 methods, 80.5% (66/82) of the staff reported that it was the usual practice, 18.3% (15/82) because it  
215 was instructed by the first level supervisor, information overload was provided as the main reason by  
216 a participant (1.2%, 1/82).

217 Of the sixty-six participants who reported standard practice as their main reason, the majority 97.0%  
218 (64/66) used sliding scale and the remaining 3.0% (2/66) used other glycaemia control methods. A  
219 statistically significant association (Likelihood=65.778,  $p=0.000$ ) was found between the reasons of  
220 using a particular control method and glycaemia control methods.

221 The staff were requested to provide their opinion on the control methods used, their opinion was  
222 recoded as satisfied (yes), not satisfied (no) and no opinion (do not know). More than half (53.7%,  
223 44/82) were not satisfied with the control method they were using, they were 41.5% (34/82) who  
224 were satisfied and 4.9% (4/82) could not provide a justification. A no statistical significant  
225 association (Likelihood=2.018,  $p=0.365$ ) was found between the control method used and the  
226 satisfaction towards the method used.

## 227 **Number of infusion pumps per ICU**

228 The number of infusion pumps available per ICU patient ranged from 0 to 6 with a statistically  
 229 significant mean infusion pumps of  $2.95 \pm 1.33$  ( $p= 0.001$ ) across the five ICUs (3 mixed, 1 cardiac  
 230 and 1 surgical). This average varied across the ICUs, the lowest mean was recorded in the surgical  
 231 unit with a mean of  $1.70 \text{ pumps} \pm 0.82$  [range: 0-3]. The cardiac unit had an average of  $2.25$   
 232  $\text{pumps} \pm 1.39$  [range: 1 – 5]. The mixed ICUs were more equipped with an average of  $2.86$   
 233  $\text{pumps} \pm 0.86$  [range: 2-5] in Room-B,  $3.15 \text{ pumps} \pm 1.03$  [1-6] in CCR1 and  $3.57 \text{ pumps} \pm 1.6$  [1-6] in  
 234 CCR2.

## 235 **Characteristics of ICU patients**

236 Of the Fifty-five patients selected across the ICUs of the Military Hospital, 50.9% were males and  
 237 49.1% were females. They were between 19 and 95 years with a median age of 63.5 years. More  
 238 than half (58.2%, 32/55) were under enteral feeding. Their glycaemia status indicated that 72.8%  
 239 (40/55) were non-diabetic; 23.6% (13/55) and 3.6% (2/55) were respectively type 2 and type 1  
 240 diabetic patients. Table 4 displayed the other characteristics of the patients.

241 **Table 4: Characteristics of the patients hospitalized in the ICUs of the Military Hospital (n=55)**

| <b>Variable</b>                      | <b>n</b> | <b>%</b> | <b>Variable</b>                          | <b>n</b> | <b>%</b> |
|--------------------------------------|----------|----------|------------------------------------------|----------|----------|
| <b>Gender (n=55)</b>                 |          |          | <b>Renal function (n=55)</b>             |          |          |
| Male                                 | 28       | 50.9     | Normal                                   | 33       | 60.0     |
| Female                               | 27       | 49.1     | Impaired                                 | 22       | 40.0     |
| <b>Age in years (n=54)</b>           |          |          | <b>Liver function (n=55)</b>             |          |          |
| Median                               | 63.5     |          | Normal                                   | 53       | 96.4     |
| Min-Max                              | 19-95    |          | Impaired                                 | 2        | 3.6      |
| <b>Patients conditions (n=55)</b>    |          |          | <b>Patients on vasopressors (n=55)</b>   |          |          |
| Sepsis                               | 17       | 30.9     | No                                       | 46       | 83.6     |
| Neurological                         | 8        | 14.5     | Yes                                      | 9        | 16.4     |
| Cardiovascular                       | 8        | 14.5     | <b>Patients on steroids (n=55)</b>       |          |          |
| Trauma                               | 8        | 14.5     | No                                       | 43       | 78.2     |
| Stroke                               | 5        | 9.1      | Yes                                      | 12       | 21.8     |
| Gastroenterology                     | 3        | 5.5      | <b>Patients on quinine I.V. (n=55)</b>   |          |          |
| Cancer/Tumor                         | 2        | 3.6      | No                                       | 54       | 98.2     |
| Endocrine                            | 2        | 3.6      | Yes                                      | 1        | 1.8      |
| Respiratory                          | 2        | 3.6      | <b>On Fluoroquinolones (n=55)</b>        |          |          |
| <b>Hyper glycaemia status (n=55)</b> |          |          | No                                       | 51       | 92.7     |
| Non diabetic                         | 40       | 72.8     | Yes                                      | 4        | 7.3      |
| Type 2 DM                            | 13       | 23.6     | <b>On atypical antipsychotics (n=55)</b> |          |          |

|                              |    |      |     |    |      |
|------------------------------|----|------|-----|----|------|
| Type 1 DM                    | 2  | 3.6  | No  | 54 | 98.2 |
| <b>Feeding status (n=55)</b> |    |      | Yes | 1  | 1.8  |
| Enteral feeding              | 32 | 58.2 |     |    |      |
| Oral feeding                 | 15 | 27.3 |     |    |      |
| Non per oral                 | 8  | 14.5 |     |    |      |

242

## 243 Glycaemic status of ICU patients and hyperglycaemia control methods 244 used in Military Hospital

245 A highly statistically significant association (Likelihood ratio=49.964,  $p= 0.000$ ) was found between

246 the hyperglycaemia control method used and the diabetes status of the patients as indicated by table

247 5.

248 **Table 5: Hyperglycaemia control methods by the glycaemic status of the patients (n=55)**

| Method used           | Hyperglycaemia status |            |           |             |              |             | Total     | $p$ -value*  |       |
|-----------------------|-----------------------|------------|-----------|-------------|--------------|-------------|-----------|--------------|-------|
|                       | Type 1 DM             |            | Type 2 DM |             | Non-diabetic |             |           |              |       |
|                       | n                     | %          | n         | %           | n            | %           |           |              |       |
| Sliding scale         | 0                     | 0.0        | 9         | 81.8        | 2            | 18.2        | 11        | 20.0         | 0.000 |
| Basal-Bolus           | 0                     | 0.0        | 2         | 100.0       | 0            | 0.0         | 2         | 3.6          |       |
| Insulin I.V infusion  | 0                     | 0.0        | 1         | 100.0       | 0            | 0.0         | 1         | 1.8          |       |
| Other methods         | 1                     | 33.3       | 1         | 33.3        | 1            | 33.3        | 3         | 5.5          |       |
| None                  | 1                     | 2.6        | 0         | 0.0         | 37           | 97.4        | 38        | 69.1         |       |
| <b>Total patients</b> | <b>2</b>              | <b>3.6</b> | <b>13</b> | <b>23.6</b> | <b>40</b>    | <b>72.7</b> | <b>55</b> | <b>100.0</b> |       |

249 \* Likelihood ratio=49.964

## 250 Blood glucose levels and hyperglycaemia control methods used

251 Two classifications of random blood glucose (glycaemic levels and the NICE-SUGAR blood glucose

252 levels) were used. The *glycaemic levels classification* revealed that 79.6% (43/54) of the patients

253 were normal glycaemic (BG: 71-180 mg/dl), 18.5% (10/54) were hyperglycaemic (BG: > 180 mg/dl)

254 and a patient (1.9%, 1/54) was hypoglycaemic (BG: < 71 mg/dl). In the other hand, the *NICE-*

255 *SUGAR blood glucose classification* indicated that 61.1% (33/54) of the patients were below range

256 (BG: <140 mg/dl), 20.4% (11/54) were in within random glucose level (BG: 140-180 mg/dl), 18.5%

257 (10/54) were above the range of BG > 180 mg/dl.

258 Regarding the hyperglycaemia control methods, they were used for 31.5% (17/54) of the patients.

259 Table 6 revealed that 5.9% (1/17) of the patients was monitored in using the best appropriate method

260 which was insulin infusion; 29.4% (5/17) of the patients were under alternative glycaemia control

261 methods which were namely basal- bolus (11.8%, 2/17), mixed insulin (11.8%, 2/17) and Oral  
 262 (5.9%, 1/17). Unfortunately, the majority of patients (64.7%, 11/17) had their glycaemia control  
 263 based on the old fashion method of sliding scale despite a no statistically significant association  
 264 (likelihood ratio=10.108,  $p=0.258$ ) between the NICE- SUGAR targets and the method used.

265 **Table 6: Glycaemic levels of patients by hyperglycaemia control methods (n=17)**

| Hyperglycemia control method | NICE-SUGAR blood glucose levels |             |                            |             |                           |             | Total     | <i>p</i> -value* |
|------------------------------|---------------------------------|-------------|----------------------------|-------------|---------------------------|-------------|-----------|------------------|
|                              | Above range (BG>180mg/dl)       |             | In range (BG 140-180mg/dl) |             | Below range (BG<140mg/dl) |             |           |                  |
|                              | n                               | %           | n                          | %           | n                         | %           |           |                  |
| Sliding scale                | 4                               | 36.4        | 1                          | 9.1         | 6                         | 54.5        | 11        | 64.7             |
| Basal- Bolus                 | 1                               | 50.0        | 0                          | 0.0         | 1                         | 50.0        | 2         | 11.8             |
| Mixed insulin                | 2                               | 100.0       | 0                          | 0.0         | 0                         | 0.0         | 2         | 11.8             |
| Oral (Glimepiride)           | 1                               | 100.0       | 0                          | 0.0         | 0                         | 0.0         | 1         | 5.9              |
| Insulin infusion             | 0                               | 0.0         | 1                          | 100.0       | 0                         | 0.0         | 1         | 5.9              |
| <b>Total patients</b>        | <b>8</b>                        | <b>47.1</b> | <b>2</b>                   | <b>11.8</b> | <b>7</b>                  | <b>41.2</b> | <b>17</b> | <b>100.0</b>     |

266 \* Likelihood ratio=10.108

## 267 Discussion

268 More than half (66.7%, 14/21) of the doctors received a training on hyperglycaemia control, while,  
 269 only 36.7% (22/60) of the nurses were trained with a statistically significant difference ( $p=0.017$ )  
 270 between the status of the staff and being trained on hyperglycaemia; training of health professionals  
 271 is crucial to sustain evidence-based practice [30, 31].

272 In this study, regarding the knowledge of staff about hyperglycaemia control methods, there was no  
 273 difference ( $p >0.05$ ) between the knowledge of doctors and nurses on Basal-Bolus and insulin  
 274 infusion methods and their training status. This raised a question on the training programs  
 275 implemented and emphasized the need for a standard updated policy with appropriate training  
 276 material addressing the gaps of knowledge on hyperglycaemia control methods regardless the status  
 277 of the staff [18].

278 Target blood glucose level of 140- 180 mg/dl, acceptable for most ICU patients [11] and adopted by  
 279 most of the major agencies [2, 3, 13] was known by only 11% of our study participants.

280 In our research, the practice of staff towards blood glucose monitoring frequency did not differ  
 281 between trained and untrained doctors and nurses. This monitoring method using point of care

282 (POC), glucometer or ICU laboratory, is acceptable as well as continuous glucose monitoring  
283 (CGM) [32]. However, regarding the practice towards DKA, as published in the literature [1, 19, 33],  
284 it statistically differed between doctors and nurses ( $p=0.006$ ), as well as, according to training status  
285 ( $p=0.036$ ).

286 Consistent with guideline-based practice [34, 35], all the staff (100.0%) of the cardiac care unit  
287 (CCU) in the Military Hospital were practicing the HbA1c measurement, as expected in such unit;  
288 contrary to the mixed (71.9%) and surgical ICUs (30.0%) with a statistically significant difference  
289 ( $p= 0.002$ ) across the ICUs.

290 Detailed assessment on barriers and facilitators on policy implementation was published elsewhere  
291 [18, 31] as well as the availability of infusion pumps (indicated for the administration of insulin) in  
292 ICU [13, 34, 35]. Our findings revealed that the surgical ICU was the least equipped with an average  
293 of 1.7 infusion pumps $\pm$ 0.82.

294 The dominant hyperglycaemia control method in both surgical and mixed ICUs was sliding scale,  
295 which stood as the standard practice of our study participants while this method was discouraged [17,  
296 19, 34, 36, 37]. Insulin infusion method is the recommended control method [1, 28, 22, 37], hence  
297 the need to move away nowadays from sliding scale [36]. This was our leitmotiv for proposing a  
298 protocol for glycaemia control in Sudan ICUs Military Hospital (supporting information S1). The  
299 proposed protocol is justified by our findings, which revealed that more than half of the care  
300 providers used sliding scale and were satisfied with it. Despite 89.0% of those caregivers did not  
301 know the target BG level [11] with a no statistically significant association ( $p= 0.365$ ) between the  
302 staff satisfaction and the methods used. This appeal for the adoption of local institutional guidelines  
303 for all Military Hospital ICUs given the diversity of the specialities of health professionals [34].

304 Regarding patient safety, no glycaemia control method was used for the majority (69.1%, 38/55) of  
305 the patients; this was consistent with a Brazilian study [38] reporting the dominant use of sliding  
306 scale in ICUs; this reduced the use of basal-bolus and insulin infusion methods (69.2%, 7.1%, 3.9%).

307 The American Diabetes Association (ADA) [2] and Nottingham University Hospitals (NUH)  
308 guidelines [13], which pledged that hyperglycaemic patients even non- diabetics should have their  
309 glycaemia levels controlled, contradicted our findings and the ones of Moreira J.E.D et al. [38].

310 The blood glucose readings pointed that 11.8% of the patients had readings in the target range of  
311 140-180 mg/dl, 41.2% had BG levels below the target range and 47.1% of the patients were  
312 hyperglycaemic (BG > 180 mg/dl). Our findings raised concerns about the nutritional status of the  
313 patients and the methods used as discussed in the literature [8, 9, 39]. In our research, insulin  
314 infusion method was used for one patient and the NICE-SUGAR target was achieved in-line with  
315 published data [6, 11]. While, mixed insulin method did not achieve the target glycaemic range as  
316 already reported by Marik P.E et al. [10]. Sliding scale method achieved the target range in only  
317 9.1% of the patients of our study; consistent with published literature [8, 19, 40] recommending the  
318 use of insulin infusions in ICU patients to achieve the NICE-SUGAR range which had proven  
319 efficacy and safety in low-income countries [41].

320 The limitations of our study were due to the exclusion of the medical ICU because of renovation at  
321 the time of our data collection, and the data collected from working staff were not validated through  
322 Cronbach test of reliability. Nonetheless, the findings provided key elements that enabled the  
323 development of a protocol approved by the decision making ICU professionals and yet to be applied  
324 with respect to the forthcoming national guidelines.

## 325 **Conclusions**

326 The poor knowledge and a lack of awareness towards hyperglycaemia management led to  
327 inappropriate implementation of glycaemia control methods across the Military Hospital ICUs.  
328 Sustained training programs on hyperglycaemia control for ICU healthcare staff are indicated as well  
329 as the availability of local guidelines on glycaemia control in all ICUs is needed. For best practice in  
330 ICUs, the use of intravenous insulin infusion targeting NICE-SUGAR blood glucose level should be  
331 recommended firstly, then, switching to basal-bolus method with nutritional support when patients  
332 get stable [6,39].

## 333 **Declarations**

### 334 **Ethical approval and consent to participate**

335 SUMASRI Institutional Review Board of the University of Medical Sciences and Technology  
336 reviewed the proposal. Ethical Approval was obtained from the Military Hospital, the  
337 implementation of the research was granted by the administration of the respective ICUs.  
338 Participants (doctors, nurses and patients) were well informed about the research objectives and  
339 verbal consent was obtained from each of them. They were ensured about their confidentiality with  
340 the use of an anonymous research tool and that the data collected from them would be used strictly  
341 for the purpose of the study objectives.

### 342 **Consent for publication**

343 Not applicable

### 344 **Availability of data and materials**

345 To support data sharing and in compliance with PLOS data policy, all the data used in the framework  
346 of this research will be deposit to Dryad Digital Repository through [data@plos.org](mailto:data@plos.org) to obtain a DOI  
347 which will be communicated to PLOS ONE.

### 348 **Competing interests**

349 The authors declared no competing interest.

### 350 **Funding**

351 Ghada Omer Hamad Abd El-Raheem bore all the cost related to the study in the framework of her  
352 thesis for the post-graduate Diploma in Research methodology and Biostatistics in the University of  
353 Medical Sciences and Technology.

### 354 **Authors' contributions**

355 **AOHG:** Elaborated the research proposal, implemented the field data collection, developed the local  
356 protocol for glycaemia control, conducted the statistical analysis and drafted the initial manuscript  
357 and the final manuscript.



358 **AMAM:** Facilitated the administrative arrangements at the Military Hospital, revised the proposal  
359 and read the final manuscript prior to submission.

360 **NM:** Supervised the implementation of the research from proposal to completion, and proof read the  
361 final the manuscript.

## 362 **Abbreviations**

363 **AACE:** American Association of Clinical Endocrinologists

364 **ACP:** American College of Physicians

365 **ADA:** American Diabetes Association, **BG:** Blood glucose

366 **CCR:** Critical Care Room

367 **CCU:** Cardiac Care Unit

368 **CGM:** Continuous Glucose Monitoring

369 **ICU:** Intensive Care Unit

370 **IIT:** Intensive Insulin Therapy

371 **NICE-SUGAR:** The Normoglycaemia in Intensive Care Evaluation - Survival Using Glucose  
372 Algorithm Regulation

373 **NUH:** Nottingham University Hospitals

374 **POC:** point of care

375 **SCCM:** Society of Critical Care Medicine

376 **SGC:** Space Glucose Control

## 377 **Acknowledgments**

378 The authors are grateful to the patients, doctors and nurses of the Military Hospital whose  
379 participation enabled this study to be completed.

## 380 **References**

- 381 1. Bass SN, Bauer SR. Hepatic failure/GI/endocrine emergencies. In: Bass S, Benken ST, et al., eds.  
382 Critical Care Pharmacy Preparatory Review and Recertification Course, 2019 ed. Lenexa, KS:  
383 American College of Clinical Pharmacy, 2019: P 569- 626.
- 384 2. Klonoff DC. Intensive insulin therapy in critically ill-hospitalized patients: making it safe and  
385 effective. *J Diabetes Sci Technol*; 2011: 755-767. Doi:10.1177/193229681100500330
- 386 3. Clain J, Ramar K, Surani SR. Glucose control in critical care.. *World J Diabetes*. 2015 Aug 10;  
387 6(9): 1082–1091.
- 388 4. Abu-Samah A, Knopp JL, Abdul Razak NN, et al. Model-based glycemic control in a Malaysian  
389 intensive care unit: performance and safety study. *Med Devices (Auckl)*. 2019; 12:215-226.  
390 Published 2019 May 31. doi:10.2147/MDER.S187840
- 391 5. Van Strrn SC, Rijkenberg S, Van der Voort PHJ, DeVries JH. The association of intravenous  
392 insulin and glucose infusion with intensive care unit and hospital mortality: a retrospective study.  
393 *Ann Intensive Care*. 2019; 9(29): 12.
- 394 6. Doolin MK, Walroth TA, Harris SA, Whitten JA, Fritschle-Hilliard AC. Transition From  
395 Intravenous to Subcutaneous Insulin in Critically Ill Adults. *J Diabetes Sci Technol*. 2016;10(4):932-  
396 938. Published 2016 Jun 28. Doi:10.1177/1932296816629985
- 397 7. Davis G, Fayfman M, Reyes-Umpierrez D, et al. Stress hyperglycemia in general surgery: Why  
398 should we care?. *J Diabetes Complications*. 2018; 32(3):305-309.  
399 doi:10.1016/j.jdiacomp.2017.11.010.
- 400 8. Dickerson R. Fluids, electrolytes, acid-base disorders and nutrition support. In: Bass S, Benken  
401 ST, et al., eds. Critical Care Pharmacy Preparatory Review and Recertification Course, 2019 ed.  
402 Lenexa, KS: American College of Clinical Pharmacy, 2019: P 83- 137.

- 403 9. Gosmanov AR, Umpierrez GE. Management of hyperglycaemia during enteral and parenteral  
404 nutrition therapy. *Curr Diab Rep.*2013; 13(1): 155-162.
- 405 10. Marik PE. Glycemic control in critically ill patients: What to do post NICE-SUGAR?. *World J*  
406 *Gastrointest Surg.* 2009;1(1):3-5. doi:10.4240/wjgs.v1.i1.3.
- 407 11. Finfer S, Chittock D, et al. Intensive versus conventional glucose control in critically ill patients  
408 with traumatic brain injury: long-term follow-up of a subgroup of patients from the NICE-SUGAR  
409 study. *Intensive Care Med.* 2015;41(6):1037-1047. doi:10.1007/s00134-015-3757-6
- 410 12. Bellomo R, Egi M. What Is a NICE-SUGAR for Patients in the Intensive Care Unit?. *Mayo Clin*  
411 *Proc.* 2009; 84 (5):400-402.
- 412 13. Alrifai Z, Beed M, Javaid A, Jamieson E. Management and monitoring of insulin infusions and  
413 glycemic control in adult critical care patients. *Nottingham University Hospitals NHS; 3.* 2020. P 19.
- 414 14. Qaseem A, Humphrey LL, Chou R, Snow V, Shekelle P; Clinical Guidelines Committee of the  
415 American College of Physicians. Use of intensive insulin therapy for the management of glycemic  
416 control in hospitalized patients: a clinical practice guideline from the American College of  
417 Physicians. *Ann Intern Med.* 2011;154(4):260-267. Doi:10.7326/0003-4819-154-4-201102150-  
418 00007
- 419 15. Okabayashi T, Shima Y, Sumiyoshi T, et al. Intensive versus intermediate glucose control in  
420 surgical intensive care unit patients. *Diabetes Care.* 2014;37(6):1516-1524. Doi:10.2337/dc13-1771
- 421 16. Gandhi H, Sarvaia A, Malhotra A, Acharya H, Shah K, Rajavat J. Effects of Glargine Insulin on  
422 Glycaemic Control in Patients with Diabetes Mellitus Type II Undergoing Off-pump Coronary  
423 Artery Bypass Graft. *Annals of Cardiac Anaesthesia.*2018: 167-172.
- 424 17. Clayton J. Guideline for Variable Rate Insulin Infusion (VRIII) prescription and supplementary  
425 fluid prescription. *Nottingham University Hospitals NHS.* 2018; 2: P 12.

- 426 18. Zimmerman LH. Practice administration and development: Protocol development and quality  
427 improvement. In: Bass S, Benken ST, et al., eds. Critical Care Pharmacy Preparatory Review and  
428 Recertification Course, 2019 ed. Lenexa, KS: American College of Clinical Pharmacy, 2019: P 247-  
429 282.
- 430 19. Alldredge, B. K., Corelli, R. L., Ernst, M. E., Guglielmo, B. J., Jacobson, P. A., Kradjan, W. A.,  
431 & Williams, B. R. (2013). Koda-Kimble and Young's applied therapeutics: The clinical use of drugs.  
432 Wolters Kluwer Health Adis (ESP).
- 433 20. Preiser, J.-C., Chase, J. G., Hovorka, R., Joseph, J. I., Krinsley, J. S., De Block, C., Wernerman,  
434 J. (2016). Glucose Control in the ICU: A Continuing Story. Journal of Diabetes Science and  
435 Technology, 10(6), 1372–1381. <https://doi.org/10.1177/1932296816648713>
- 436 21. Jacobi J, Bircher N, Krinsley J, et al. Guidelines for the use of an insulin infusion for the  
437 management of hyperglycemia in critically ill patients. Crit Care Med. 2012;40(12):3251-3276.  
438 doi:10.1097/CCM.0b013e3182653269.
- 439 22. De Block CEM, Rogiers P, Jorens PG, et al. A comparison of two insulin infusion protocols in  
440 the medical intensive care unit by continuous glucose monitoring. Annals of Intensive Care. 2016  
441 Dec;6(1):115. DOI: 10.1186/s13613-016-0214-9.
- 442 23. Miller EE, Lalla M, Zaidi A, Elgash M, Zhao H, Rubin DJ. Eating and Glycemic Control among  
443 Critically Ill Patients Receiving Continuous Intravenous Insulin. Endocr Pract. 2020;26(1):43-50.  
444 doi:10.4158/EP-2019-0095.
- 445 24. Stewart KW et al.,. How should we interpret retrospective blood glucose measurements?  
446 Sampling and Interpolation. IFAC.2017; 50 (1): 874-879. IFAC PapersOnLine 50-1 (2017) 874–879.
- 447 25. Wilson M, Weinreb J, Hoo GW. Intensive insulin therapy in critical care: a review of 12  
448 protocols. Diabetes Care. 2007;30(4):1005-1011. doi:10.2337/dc06-1964

- 449 26. John SM, Waters KL, Jivani K. Evaluating the Implementation of the EndoTool Glycemic  
450 Control Software System. *Diabetes Spectrum* 2018 Feb; 31(1): 26-30. [https://doi.org/10.2337/ds16-](https://doi.org/10.2337/ds16-0061)  
451 [0061](https://doi.org/10.2337/ds16-0061).
- 452 27. Chase JG, Desai T, Bohe J, et al. Improving glycemic control in critically ill patients:  
453 personalized care to mimic the endocrine pancreas. *Crit Care*. 2018;22(1):182. Published 2018 Aug  
454 2. doi:10.1186/s13054-018-2110-1.
- 455 28. Steil, G. M., Deiss, D., Shih, J., Buckingham, B., Weinzimer, S., & Agus, M. S. D. (2009).  
456 Intensive Care Unit Insulin Delivery Algorithms: Why So Many? How to Choose? *Journal of*  
457 *Diabetes Science and Technology*, 3(1), 125–140. <https://doi.org/10.1177/193229680900300114>.
- 458 29. Blaha J, Barteczko-Grajek B, Berezowicz P, et al. Space GlucoseControl system for blood  
459 glucose control in intensive care patients--a European multicentre observational study. *BMC*  
460 *Anesthesiol*. 2016;16:8. Published 2016 Jan 22. doi:10.1186/s12871-016-0175-4.
- 461 30. Boucher BA, Haas C. critical care pharmacy evolution and validation, practice standards, training  
462 and professional development. In: Bass S, Benken ST, et al., eds. *Critical Care Pharmacy Preparatory*  
463 *Review and Recertification Course*, 2019 ed. Lenexa, KS: American College of Clinical Pharmacy,  
464 2019: P 821- 860.
- 465 31. Meijering S, Corstjens AM, Tulleken JE, Meertens JH, Zijlstra JG, Ligtenberg JJ. Towards a  
466 feasible algorithm for tight glycaemic control in critically ill patients: a systematic review of the  
467 literature. *Crit Care*. 2006; 10(1):R19. Doi: 10.1186/cc3981.
- 468 32. Boom DT, Sechterberger MK, Rijkenberg S, et al. Insulin treatment guided by subcutaneous  
469 continuous glucose monitoring compared to frequent point-of-care measurement in critically ill  
470 patients: a randomized controlled trial. *Crit Care*. 2014; 18(4):453. Published 2014 Aug 20. Doi:  
471 10.1186/s13054-014-0453-9.

- 472 33. Clayton J. NUH management of diabetic ketoacidosis in adults (18 years old and over).  
473 Nottingham University Hospitals NHS. 2017. P 2. <http://www.diabetologists->  
474 [abcd.org.uk/JBDS/JBDS.htm](http://abcd.org.uk/JBDS/JBDS.htm) and the Diabetes UK website at [www.diabetes.org.uk](http://www.diabetes.org.uk).
- 475 34. Dharmalingam M. Glycemic control in Intensive Care Unit. Indian J Endocr Metab 2016;  
476 20:415-7
- 477 35. Erhayiem B. Guidance based on NICE clinical guideline 130 'Management of hyperglycaemia in  
478 acute coronary syndromes' - Issued: October 2011 - [www.nice.org.uk/cg130](http://www.nice.org.uk/cg130).
- 479 36. Browning LA, Dumo P. Sliding-scale insulin: an antiquated approach to glycemic control in  
480 hospitalized patients. American Journal of Health-system Pharmacy : AJHP : Official Journal of the  
481 American Society of Health-system Pharmacists. 2004 Aug;61(15):1611-1614. DOI:  
482 10.1093/ajhp/61.15.1611.
- 483 37. Wiffen P, Mitchel M, Snelling M, Stoner N. Oxford Handbook of Clinical Pharmacy, 3<sup>rd</sup> edition  
484 Oxford University Press 2017.
- 485 38. Moreira ED Jr, Silveira PC, Neves RC, et al. Glycemic control and diabetes management in  
486 hospitalized patients in Brazil. Diabetol Metab Syndr. 2013;5(1):62. Published 2013 Oct 18.  
487 doi:10.1186/1758-5996-5-62.
- 488 39. Mesejo A, Montejo-González JC, Vaquerizo-Alonso C, et al. Diabetes-specific enteral nutrition  
489 formula in hyperglycemic, mechanically ventilated, critically ill patients: a prospective, open-label,  
490 blind-randomized, multicenter study. Crit Care. 2015;19:390. Published 2015 Nov 9.
- 491 40. Gray A, Write J, Googey V, Bruce L. Injectable drugs guide. Pharmaceutical Press. London.  
492 2011. ISBN 978 0 85369 787 9.
- 493 41. Hamimy Wet al. Application of conventional blood glucose control strategy in surgical ICU in  
494 developing countries: Is it beneficial?, Egypt J Anaesth (2015),  
495 <http://dx.doi.org/10.1016/j.egja.2015.05.002>.

496

## 497 **Supporting Information captions**

### 498 **Document attached**

499 **S1 File** Local guidelines for Hyperglycaemia Control in Intensive Care Units of Military Hospital,  
500 Sudan, 2020

### 501 **Tables**

502 **S1 Table 1:** Characteristics of the healthcare staff and training on glycaemia control (n=81)

503 **S2 Table 2:** Awareness of healthcare staff towards hyperglycaemia control methods and the reasons for lack of  
504 awareness (n=81)

505

506 **S3 Table 3:** Management of diabetic ketoacidosis (DKA) by the participants according to their status  
507 of training on glycaemia control (n=81)

508 **S4 Table 4:** Characteristics of patients admitted in the ICUs of Military Hospital (n=55)

509 **S5 Table 5:** Hyperglycaemia control methods by the glycaemic status of the patients (n=55)

510 **S6 Table 6:** Glycaemic levels of patients by hyperglycaemia control methods (n=17)

### 511 **Figure**

512 **S1 Figure 1:** Hyperglycemia control methods used among healthcare professionals

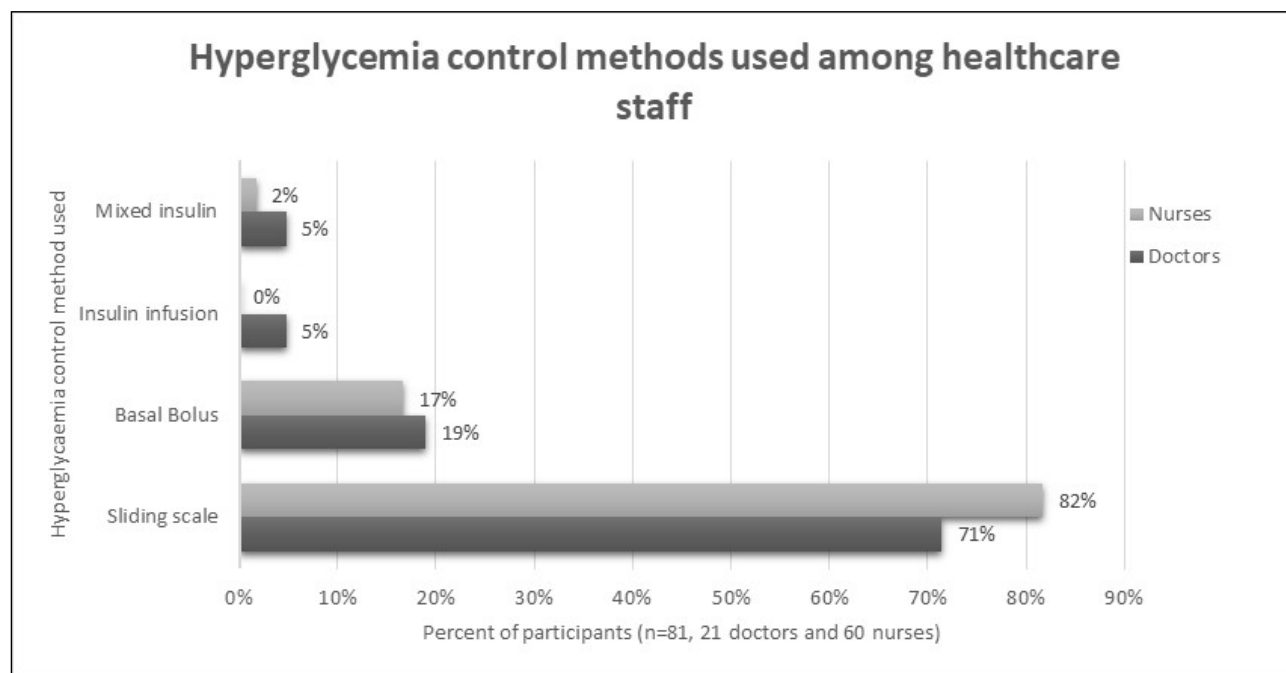

**Figure 1: Hyperglycemia control methods used among healthcare professionals**
